# Supplementary material
Source: Springer Nature journal article supplement (https://www.springermedizin.de/resource/supplementary/12913_2012_2870_MOESM4_ESM.pdf/9531732)

## Overall PC strength

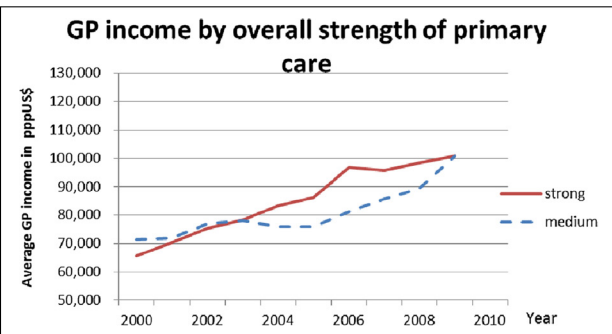

## Primary care process

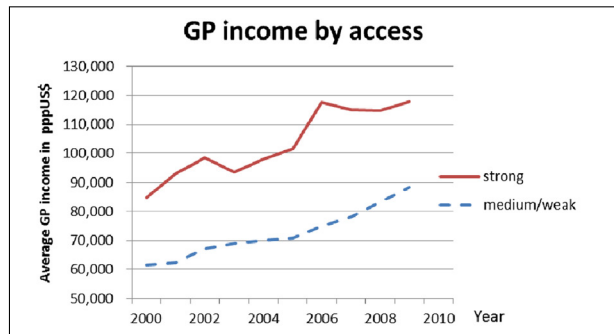

## Structure of primary care

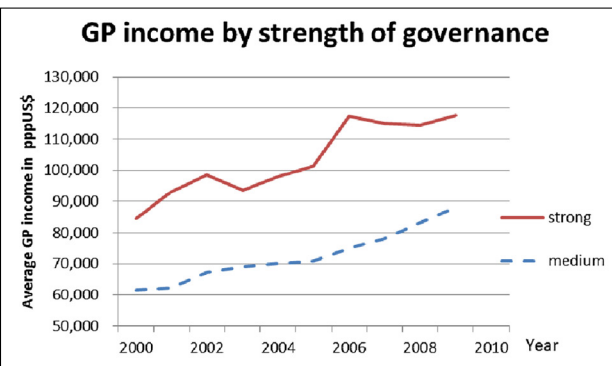

## Primary care process

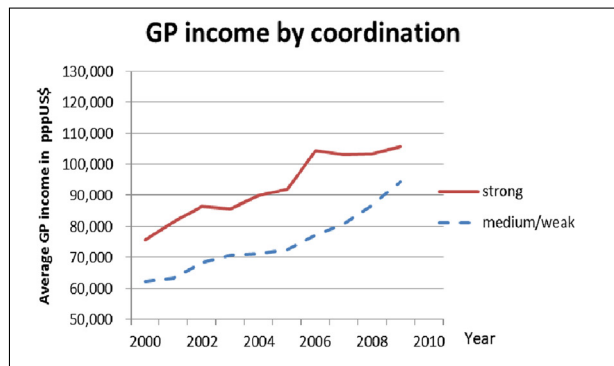

## Structure of primary care

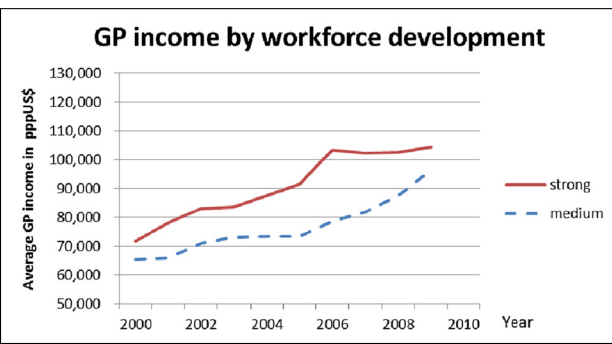

## Primary care process

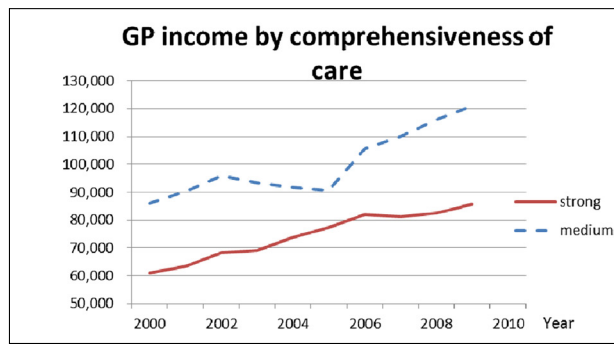

Supplement: MOESM4 [file 9531732]
